# Supplementary material
Source: PubMed Central journal article supplement (PMC6289721)

## Editorial Policy Checklist

This form is used to ensure compliance with Nature Research editorial policies related to research ethics and reproducibility. For further information, please see our [Authors & Referees](#) site. All relevant questions on the form must be answered.

### ▶ Competing interests

Policy information about [competing interests](#)

#### Competing interests declaration

In the interest of transparency and to help readers form their own judgements of potential bias, Nature Research journals require authors to declare any competing financial and/or non-financial interest in relation to the work described in the submitted manuscript.

No, I declare that the authors have no competing financial or non-financial interests as defined by Nature Research.

Yes, I declare that the authors have a competing interest as defined by Nature Research

BB is an employee at Domain Therapeutic NA, a company focused on GPCR drug discovery that sells and licenses the cell signaling kit use in this study

### ▶ Data availability

Policy information about [availability of data](#)

#### Data availability statement

All manuscripts must include a [data availability statement](#). This statement should provide the following information, where applicable:

- Accession codes, unique identifiers, or web links for publicly available datasets
- A list of figures that have associated raw data
- A description of any restrictions on data availability

A full data availability statement is included in the manuscript.

#### Mandated accession codes (where applicable)

Confirm that all relevant data are deposited into a public repository and that accession codes are provided.

All relevant accession codes are provided  Accession codes will be available before publication  No data with mandated deposition

### ▶ Data presentation

#### Image integrity

Confirm that all images comply with our [image integrity policy](#).

Unprocessed data must be provided upon request. Please double-check figure assembly to ensure that all panels are accurate (e.g. all labels are correct, no inadvertent duplications have occurred during preparation, etc.).

#### Data distribution

Present data in a format that shows data distribution (dot-plots or box-and-whisker plots).

Define all box-plot elements (e.g. center line, median; box limits, upper and lower quartiles; whiskers, 1.5x interquartile range; points, outliers).

If using bar graphs, overlay the corresponding dot plots.

Confirm that all data presentation meets these requirements and that individual data points are shown.

## Specific policy considerations

Some types of research require additional policy disclosures. Please indicate whether these apply to your study. If you are not certain, please read the appropriate section before selecting a response.

| Does not apply                      | Involved in the study                                                                                   |
|-------------------------------------|---------------------------------------------------------------------------------------------------------|
| <input checked="" type="checkbox"/> | <input type="checkbox"/> Custom software or computer code                                               |
| <input type="checkbox"/>            | <input checked="" type="checkbox"/> Macromolecular structural data                                      |
| <input checked="" type="checkbox"/> | <input type="checkbox"/> Research animals and/or animal-derived materials that require ethical approval |
| <input checked="" type="checkbox"/> | <input type="checkbox"/> Human research participants                                                    |
| <input checked="" type="checkbox"/> | <input type="checkbox"/> Clinical data                                                                  |

► Macromolecular structural data

Policy information about special considerations for specific types of data

Validation report

For all macromolecular structures studied, confirm that you have provided an official validation report from wwPDB.

I certify that all the above information is complete and correct.

Typed signature Raymond C. Stevens

Date 08/10/2018

*8/28/2018*

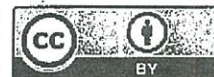

Supplement: NIHMS1505984-supplement-3.pdf [file NIHMS1505984-supplement-3.pdf]
