# Supplementary material
Source: PubMed Central journal article supplement (PMC6289721)
Supplement: NIHMS1505984-supplement-7.pdf [file NIHMS1505984-supplement-7.pdf]

## Supplementary Information

### Supplementary Table 1 | Data collection and refinement statistics (molecular replacement)

| PDB ID                                              | 6M9T                                  |
|-----------------------------------------------------|---------------------------------------|
| <b>Data collection</b>                              |                                       |
| Space group                                         | C2                                    |
| Cell dimensions                                     |                                       |
| <i>a</i> , <i>b</i> , <i>c</i> (Å)                  | 120.80, 54.85, 96.80                  |
| $\alpha$ , $\beta$ , $\gamma$ (°)                   | 90.0, 95.8, 90.0                      |
| Resolution (Å)                                      | 30.03-2.50 (2.62 – 2.50) <sup>1</sup> |
| <i>R</i> <sub>split</sub> (%)                       | 10.5 (479.1)                          |
| CC*                                                 | 0.9986 (0.569)                        |
| Completeness (%)                                    | 100 (100)                             |
| Redundancy                                          | 226.8 (88.2) <sup>2</sup>             |
| <b>Refinement</b>                                   |                                       |
| Resolution (Å)                                      | 27.27 - 2.50                          |
| No. reflections / test set                          | 22,101 / 1,050                        |
| <i>R</i> <sub>work</sub> / <i>R</i> <sub>free</sub> | 0.200 / 0.242                         |
| No. atoms                                           |                                       |
| Protein                                             | 3,398                                 |
| Ligands                                             | 26                                    |
| Lipids and other                                    | 146                                   |
| Wilson B (Å <sup>2</sup> )                          | 95.6                                  |
| <i>B</i> -factors (Å <sup>2</sup> )                 |                                       |
| EP3                                                 | 117.0                                 |
| T4L                                                 | 146.8                                 |
| Ligand                                              | 92.7                                  |
| Lipids and other                                    | 147.0                                 |
| R.m.s. deviations                                   |                                       |
| Bond lengths (Å)                                    | 0.009                                 |
| Bond angles (°)                                     | 0.95                                  |

<sup>1</sup>Highest-resolution shell is shown in parentheses.

<sup>2</sup>Data from 28,500 crystals

**Supplementary Table 2 | Affinity of misoprostol-FA for EP3 receptor WT and mutants.**

| Domain                       | Mutant       | pKi <sup>1</sup><br>(M) | SEM <sup>1</sup> (M) | p vs WT high <sup>2,3</sup> | p vs WT low <sup>3</sup> | n |
|------------------------------|--------------|-------------------------|----------------------|-----------------------------|--------------------------|---|
|                              | WT high      | 10.6                    | 0.5                  | --                          | <0.0001                  | 6 |
|                              | WT low       | 7.7                     | 0.1                  | <0.0001                     | --                       |   |
|                              | EP3-T4L high | 10.2                    | 0.2                  | 0.9999                      | <0.0001                  | 4 |
|                              | EP3-T4L low  | 7.69                    | 0.03                 | <0.0001                     | >0.9999                  |   |
| <b>Binding site position</b> |              |                         |                      |                             |                          |   |
| helix I                      | M58A         | 7.8                     | 0.1                  | <0.0001                     | >0.9999                  | 4 |
| helix II                     | T106A        | 7.7                     | 0.1                  | <0.0001                     | >0.9999                  | 4 |
|                              | T107A        | 8.37                    | 0.06                 | <0.0001                     | 0.9540                   | 3 |
|                              | V110A high   | 9.7                     | 0.3                  | 0.6009                      | <0.0001                  | 3 |
|                              | V110A low    | 8.0                     | 0.1                  | <0.0001                     | >0.9999                  |   |
|                              | Y114A        | 7.46                    | 0.03                 | <0.0001                     | >0.9999                  | 3 |
| helix III                    | M137A        | 7.6                     | 0.1                  | <0.0001                     | >0.9999                  | 3 |
| ECL2                         | T206A        | 8.17                    | 0.05                 | <0.0001                     | 0.9996                   | 3 |
|                              | T206V        | 8.32                    | 0.04                 | <0.0001                     | 0.9771                   | 3 |
|                              | W207A        | 7.8                     | 0.2                  | <0.0001                     | >0.9999                  | 3 |
|                              | F209A        | 7.9                     | 0.1                  | <0.0001                     | >0.9999                  | 4 |
| helix VI                     | L298A        | 7.86                    | 0.03                 | <0.0001                     | >0.9999                  | 3 |
| helix VII                    | L329A high   | 10.3                    | 0.4                  | >0.9999                     | <0.0001                  | 3 |
|                              | L329A low    | 8.08                    | 0.09                 | <0.0001                     | >0.9999                  |   |
|                              | V332A        | 7.88                    | 0.01                 | <0.0001                     | >0.9999                  | 3 |
|                              | R333A        | 8.0                     | 0.2                  | <0.0001                     | >0.9999                  | 3 |
|                              | R333L        | 8.05                    | 0.04                 | <0.0001                     | >0.9999                  | 3 |
|                              | S336A        | 8.0                     | 0.3                  | <0.0001                     | >0.9999                  | 3 |
|                              | Q339A        | 8.69                    | 0.02                 | <0.0001                     | 0.3702                   | 3 |
| <b>Others</b>                |              |                         |                      |                             |                          |   |
| helix II                     | Q103A        | 7.75                    | 0.01                 | <0.0001                     | >0.9999                  | 3 |
|                              | Q103L        | 7.67                    | 0.05                 | <0.0001                     | >0.9999                  | 3 |

<sup>1</sup>Value are the mean pKi ± SEM of indicated n independent experiments each done in triplicate.

<sup>2</sup>Significance was determined using one-way ANOVA analysis followed by a Tukey post-hoc statistical test against the high affinity and low affinity site for the WT receptor. p < 0.0001, F value is 15.54, among and within group degrees of freedom are 24 and 61, respectively.

<sup>3</sup>High and low refer to the high and low affinity binding, respectively.

**Supplementary Table 3 | Agonist-induced signaling on EP3 receptor mutants.**

| Domain    | Mutants                | Misoprostol-FA                     |                      |                      | PGE <sub>2</sub>                   |                      |                      |
|-----------|------------------------|------------------------------------|----------------------|----------------------|------------------------------------|----------------------|----------------------|
|           |                        | pEC <sub>50</sub> <sup>1</sup> (M) | SEM <sup>1</sup> (M) | p vs WT <sup>2</sup> | pEC <sub>50</sub> <sup>1</sup> (M) | SEM <sup>1</sup> (M) | p vs WT <sup>2</sup> |
|           | WT                     | 8.97                               | 0.02                 |                      | 9.62                               | 0.04                 |                      |
|           | <b>Binding site</b>    |                                    |                      |                      |                                    |                      |                      |
| helix I   | M58A                   | 8.69                               | 0.08                 | 0.3213               | 9.11                               | 0.05                 | 0.0156               |
| helix II  | T106A                  | 8.65                               | 0.08                 | 0.1993               | 9.14                               | 0.03                 | 0.0242               |
|           | T106V                  | 9.02                               | 0.03                 | 0.9995               | 9.6                                | 0.1                  | 0.9994               |
|           | T107A                  | 9.1                                | 0.1                  | 0.9577               | 10.1                               | 0.1                  | 0.0146               |
|           | V110A                  | 8.27                               | 0.09                 | <0.0001              | 8.54                               | 0.04                 | <0.0001              |
|           | Y114A                  | 8.03                               | 0.08                 | <0.0001              | 8.25                               | 0.04                 | <0.0001              |
|           | Y114F                  | 7.66                               | 0.08                 | <0.0001              | 7.8                                | 0.1                  | <0.0001              |
| helix III | M137A                  | 7.8                                | 0.1                  | <0.0001              | 8.5                                | 0.1                  | <0.0001              |
|           | G141A                  | 9.08                               | 0.03                 | 0.9988               | 9.51                               | 0.04                 | 0.9988               |
|           | G141L                  | 6.1                                | 0.3                  | <0.0001              | 8.0                                | 0.5                  | <0.0001              |
|           | G141W                  | 6.7                                | 0.1                  | <0.0001              | 6.3                                | 0.2                  | <0.0001              |
| ECL2      | T206A                  | 7.26                               | 0.03                 | <0.0001              | 7.14                               | 0.03                 | <0.0001              |
|           | T206V                  | 7.54                               | 0.06                 | <0.0001              | 7.38                               | 0.01                 | <0.0001              |
|           | W207A                  | 5.49                               | 0.04                 | <0.0001              | 5.9                                | 0.2                  | <0.0001              |
|           | F209A                  | 6.93                               | 0.03                 | <0.0001              | 7.33                               | 0.03                 | <0.0001              |
| helix VI  | L298A                  | 8.04                               | 0.01                 | <0.0001              | 8.16                               | 0.02                 | <0.0001              |
| helix VII | L329A                  | 6.87                               | 0.02                 | <0.0001              | 6.90                               | 0.02                 | <0.0001              |
|           | V332A                  | 8.63                               | 0.03                 | 0.1368               | 8.69                               | 0.06                 | <0.0001              |
|           | R333A                  | 5.6                                | 0.3                  | <0.0001              | 5.71                               | 0.08                 | <0.0001              |
|           | R333L                  | 7.06                               | 0.03                 | <0.0001              | 7.26                               | 0.08                 | <0.0001              |
|           | S336A                  | 8.96                               | 0.02                 | 0.9998               | 9.68                               | 0.07                 | 0.9994               |
|           | Q339A                  | 9.16                               | 0.04                 | 0.8663               | 9.75                               | 0.09                 | 0.9946               |
|           | <b>Others</b>          |                                    |                      |                      |                                    |                      |                      |
| helix I   | A53F                   | 8.87                               | 0.04                 | 0.9988               | 9.62                               | 0.02                 | >0.9999              |
|           | F54A                   | 8.47                               | 0.06                 | 0.0046               | 8.74                               | 0.01                 | <0.0001              |
| helix II  | Q103A                  | 8.4                                | 0.1                  | 0.0005               | 8.85                               | 0.01                 | <0.0001              |
|           | Q103L                  | 7.7                                | 0.1                  | <0.0001              | 8.24                               | 0.02                 | <0.0001              |
|           | G286A                  | 8.97                               | 0.05                 | >0.9999              | 9.76                               | 0.05                 | 0.9938               |
| helix VII | I340A                  | 7.43                               | 0.02                 | <0.0001              | 7.49                               | 0.04                 | <0.0001              |
|           | deltaC354 <sup>3</sup> | 8.88                               | 0.06                 | 0.9988               | 9.66                               | 0.06                 | 0.9997               |

<sup>1</sup>Value are the mean pEC<sub>50</sub> ± SEM of 6 and 3 independent experiments for WT and all mutants, respectively.

<sup>2</sup>Significance for each compound was determined using one-way ANOVA analysis followed by a Dunnett post-hoc statistical test against mean EC<sub>50</sub> determined for the WT receptor. For each compound p < 0.0001, and among and within group degrees of freedom are 29 and 63. F value are 104.7 and 114.1 for Misoprostol-FA and PGE<sub>2</sub>, respectively.

<sup>3</sup>The deltaC534 is the WT receptor truncated at residue 354.

**Supplementary Table 4 | Affinity of PGE<sub>2</sub> for EP3 receptor WT and mutants used to calculate misoprostol-FA pKi.**

| Domain    | Mutant              | pKi <sup>1</sup> (M) | SEM <sup>1</sup> (M) | n |
|-----------|---------------------|----------------------|----------------------|---|
|           | WT                  | 8.72                 | 0.09                 | 4 |
|           | EP3-T4L             | 8.8                  | 0.2                  | 4 |
|           | <b>Binding site</b> |                      |                      |   |
| helix I   | M58A                | 8.2                  | 0.3                  | 4 |
| helix II  | T106A               | 8.1                  | 0.1                  | 4 |
|           | T107A               | 8.95                 | 0.07                 | 3 |
|           | V110A               | 9.1                  | 0.3                  | 3 |
|           | Y114A               | 8.06                 | 0.09                 | 3 |
| helix III | M137A               | 7.9                  | 0.1                  | 3 |
| ECL2      | T206A               | 8.6                  | 0.1                  | 3 |
|           | T206V               | 8.71                 | 0.06                 | 3 |
|           | W207A               | 8.2                  | 0.2                  | 3 |
|           | F209A               | 8.4                  | 0.2                  | 4 |
| helix VI  | L298A               | 8.5                  | 0.1                  | 3 |
| helix VII | L329A               | 8.9                  | 0.1                  | 3 |
|           | V332A               | 8.47                 | 0.06                 | 3 |
|           | R333A               | 8.48                 | 0.07                 | 3 |
|           | R333L               | 8.45                 | 0.08                 | 3 |
|           | S336A               | 8.7                  | 0.2                  | 3 |
|           | Q339A               | 9.0                  | 0.2                  | 3 |
|           | <b>Others</b>       |                      |                      |   |
| helix II  | Q103A               | 8.35                 | 0.07                 | 3 |
|           | Q103L               | 8.2                  | 0.2                  | 3 |

<sup>1</sup>Value are the mean pKi ± SEM of indicated n independent experiments each done in triplicate.

**Supplementary Table 5 | Sulprostone-Induced Signaling on EP3 Receptor Mutants.**

| Domain    | Mutants | Sulprostone                        |                      |
|-----------|---------|------------------------------------|----------------------|
|           |         | pEC <sub>50</sub> <sup>1</sup> (M) | SEM <sup>1</sup> (M) |
|           | WT      | 9.7                                | 0.1                  |
| helix II  | Y114F   | 9.60                               | 0.06                 |
| ECL2      | T206A   | 8.67                               | 0.06                 |
|           | F209A   | 7.90                               | 0.05                 |
| helix VI  | L298A   | 8.66                               | 0.04                 |
| helix VII | R333A   | 7.0                                | 0.1                  |

<sup>1</sup>Value are the mean pEC<sub>50</sub> ± SEM of 3 independent experiments.

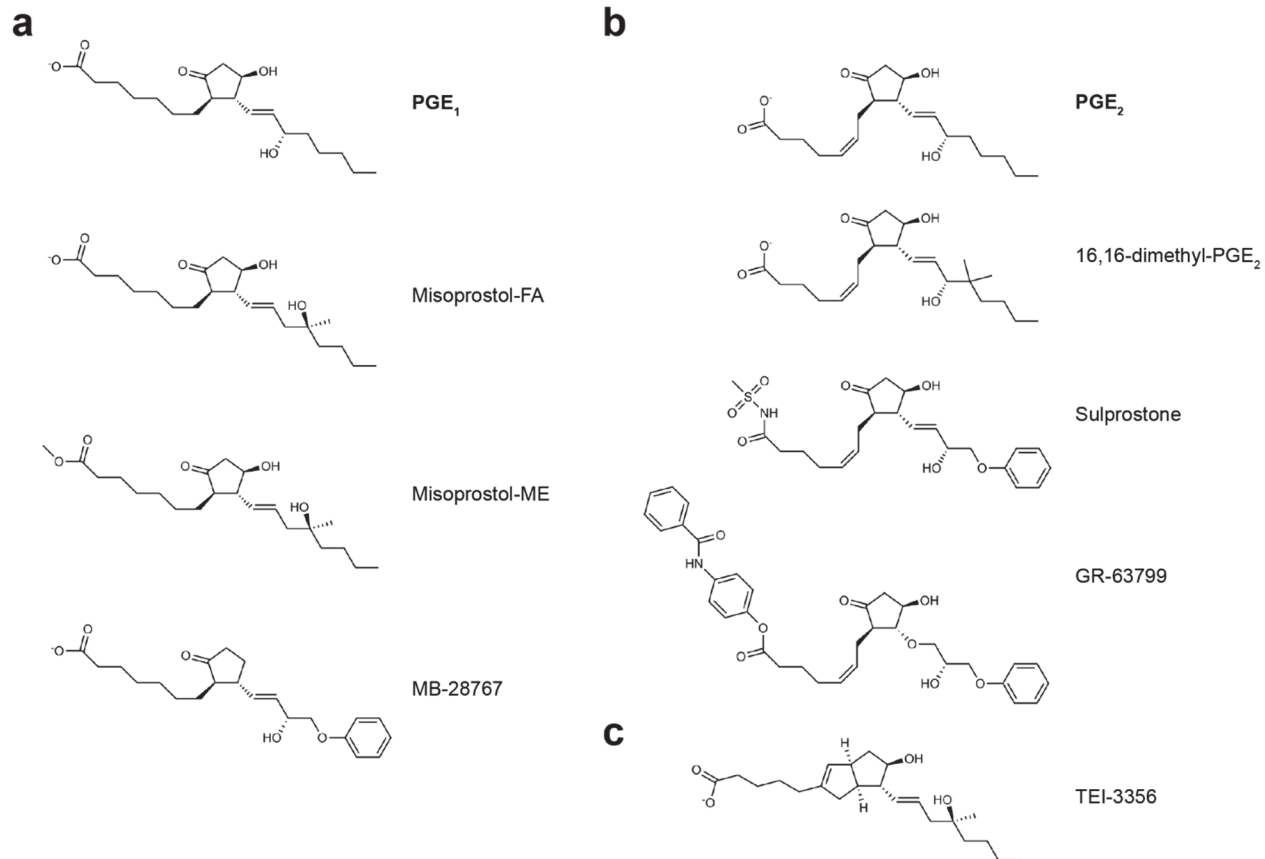

**Supplementary Figure 1 | Comparison of 2-dimensional chemical structures of EP3 receptor agonists. Prostaglandin analogues of (a) PGE<sub>1</sub>, (b) PGE<sub>2</sub> and (c) isocarbacyclin.**

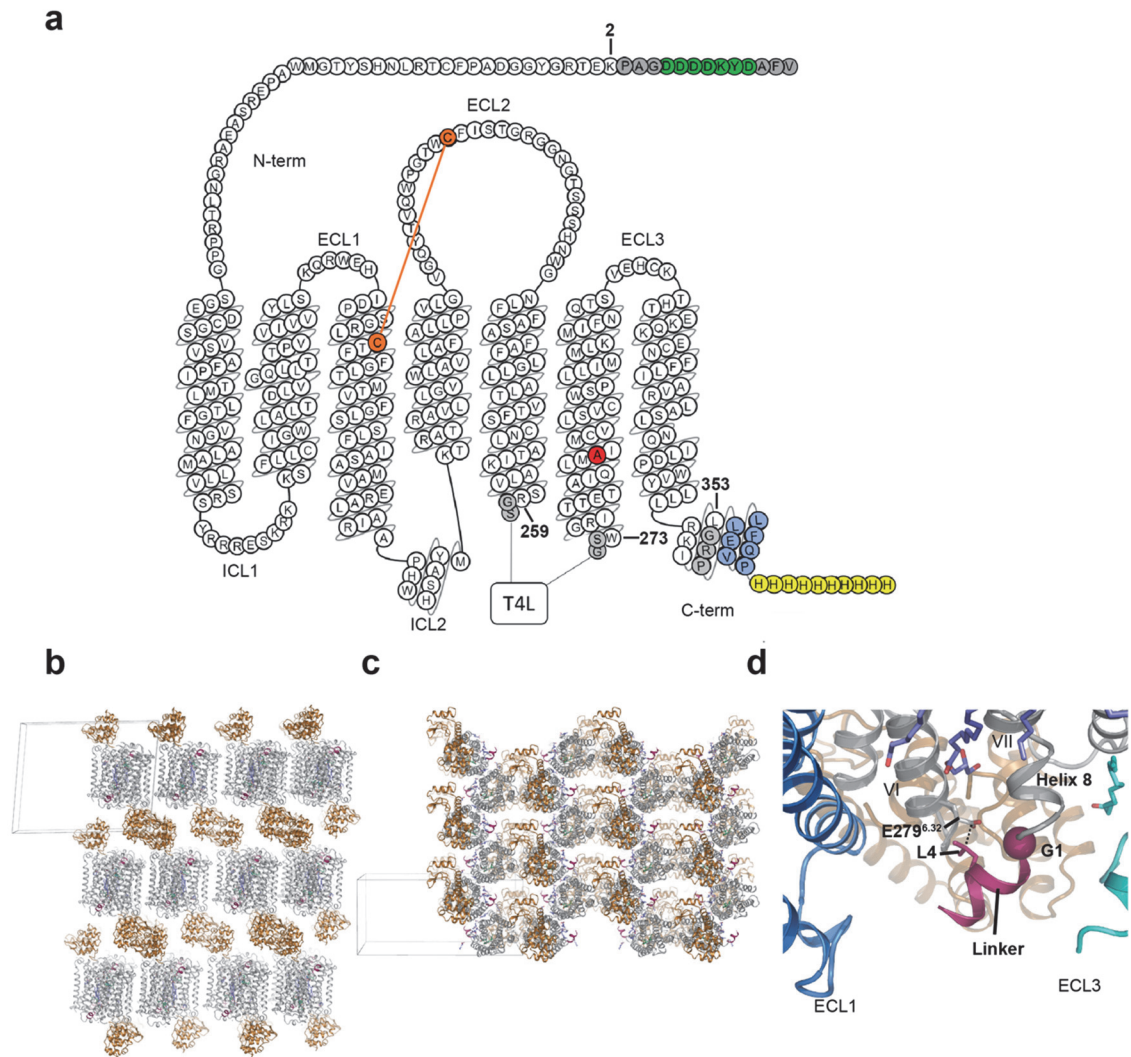

**Supplementary Figure 2 | EP3-miso crystallization.** (a) Two-dimensional representation of the amino acid sequence of the crystallization construct. Non-filled residues are native sequence of EP3 receptor. Gly286<sup>6.39</sup>Ala is indicated as red-filled residue. Cys130<sup>3.25</sup> and Cys208 residues are orange-filled. Disulfide bond is indicated as orange line. Residues colored in gray, green, yellow, and blue are non-native linkers, FLAG and poly-histidine affinity tag sequences, and precision protease cleavage site, respectively. (b) Side view and (c) top view of EP3 receptor crystal packing in the monoclinic space group *C2*. (d) Close-up view of the precision protease cleavage site fused to the truncated C-terminus of EP3 receptor in the construct used for crystallization. Two

antiparallel and contiguous EP3 monomers in the crystal are shown as cyan and dark blue cartoon. The precision protease cleavage site sequence is shown in magenta as cartoon with the first residue (G1) shown as sphere. Lipids and indicated residues are shown as sticks. EP3 receptor is shown as gray cartoon. T4-lysozyme is shown as gold cartoon. Dotted line represents a 3.5 Å non-polar contact.



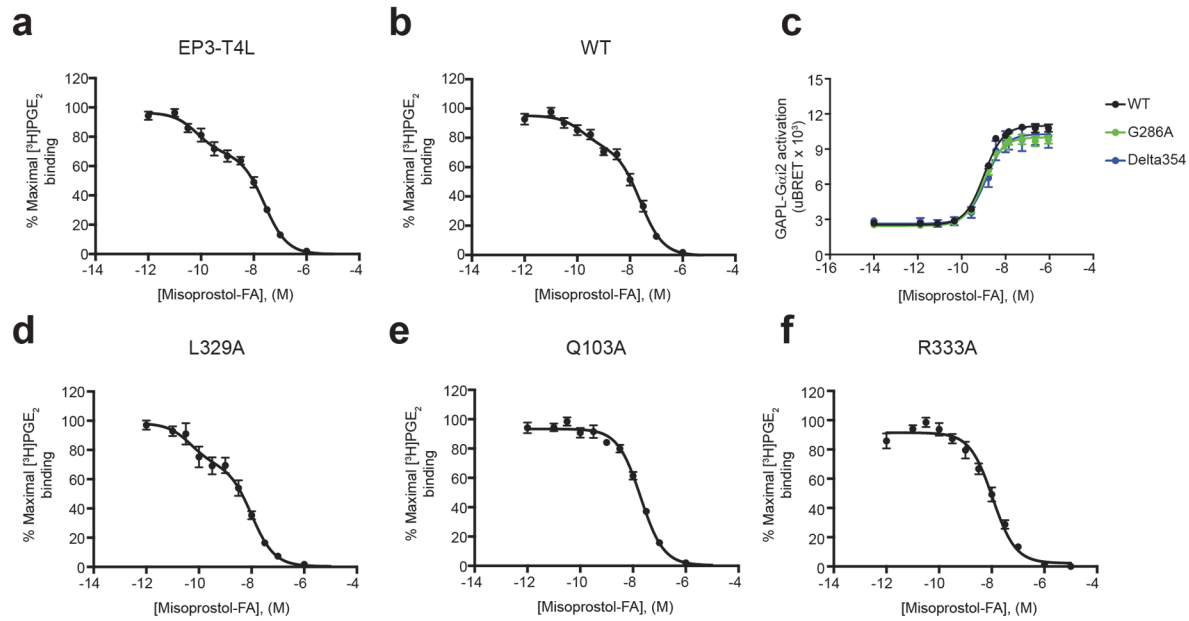

**Supplementary Figure 3 | Pharmacology of misoprostol-FA on EP3 receptor.** Competition binding assay of misoprostol-FA using [<sup>3</sup>H]PGE<sub>2</sub> as a tracer on (a) EP3-T4L, (b) WT or (d-f) mutated EP3 receptors harbouring the indicated modification. (c) Misoprostol-FA-induced signaling on different EP3 receptor modifications. Each dot shows the mean ± SEM of 4, 6 and 3 independent experiments in triplicate for the EP3-T4L, WT and mutant binding data, respectively, and 3 independent experiments for the signaling data. Data were regressed as described in the methods. Corresponding pK<sub>i</sub> and pEC<sub>50</sub> are shown in the **Supplementary Tables 2-4**.

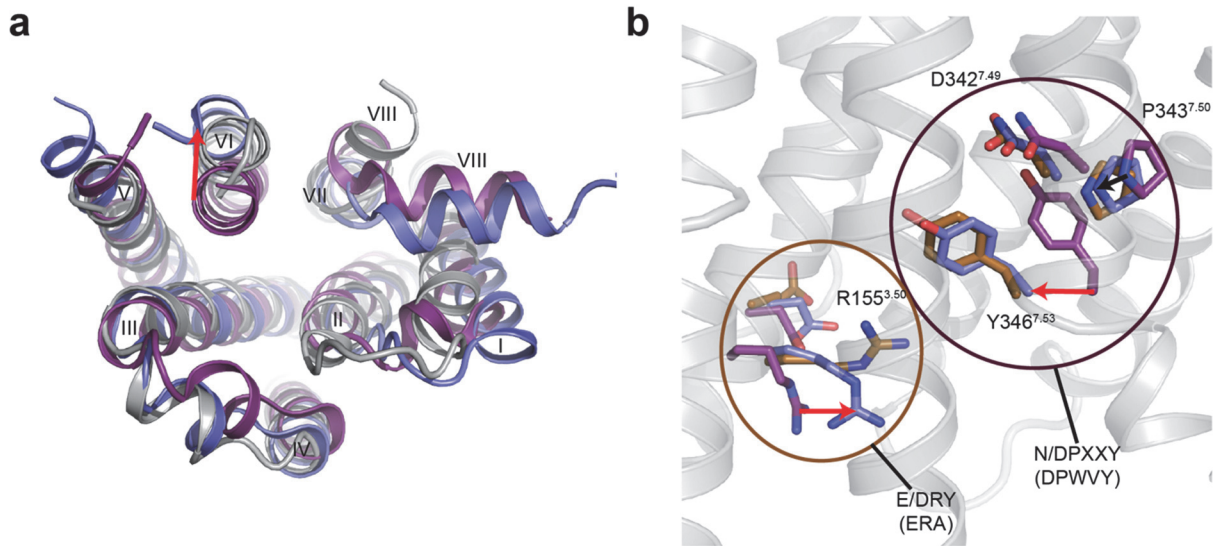

**Supplementary Figure 4 | Misoprostol-FA-induced active conformation of EP3 receptor. (a)** Intracellular view of EP3 receptor. EP3 receptor, active Cannabinoid receptor 1 (Cb1) (PDB code 5xra), and inactive Cb1 (PDB code 5tgz) are shown as gray, blue, and maroon, respectively. **(b)** Side chains of E/DRY and N/DPxxY micro-switches of EP3 receptor, active Cb1 (PDB code 5xra), and inactive Cb1 (PDB code 5tgz) are shown in gold, blue, and maroon sticks, respectively. EP3 receptor main chain is shown as gray cartoon. The red arrows indicate an activating conformational change.

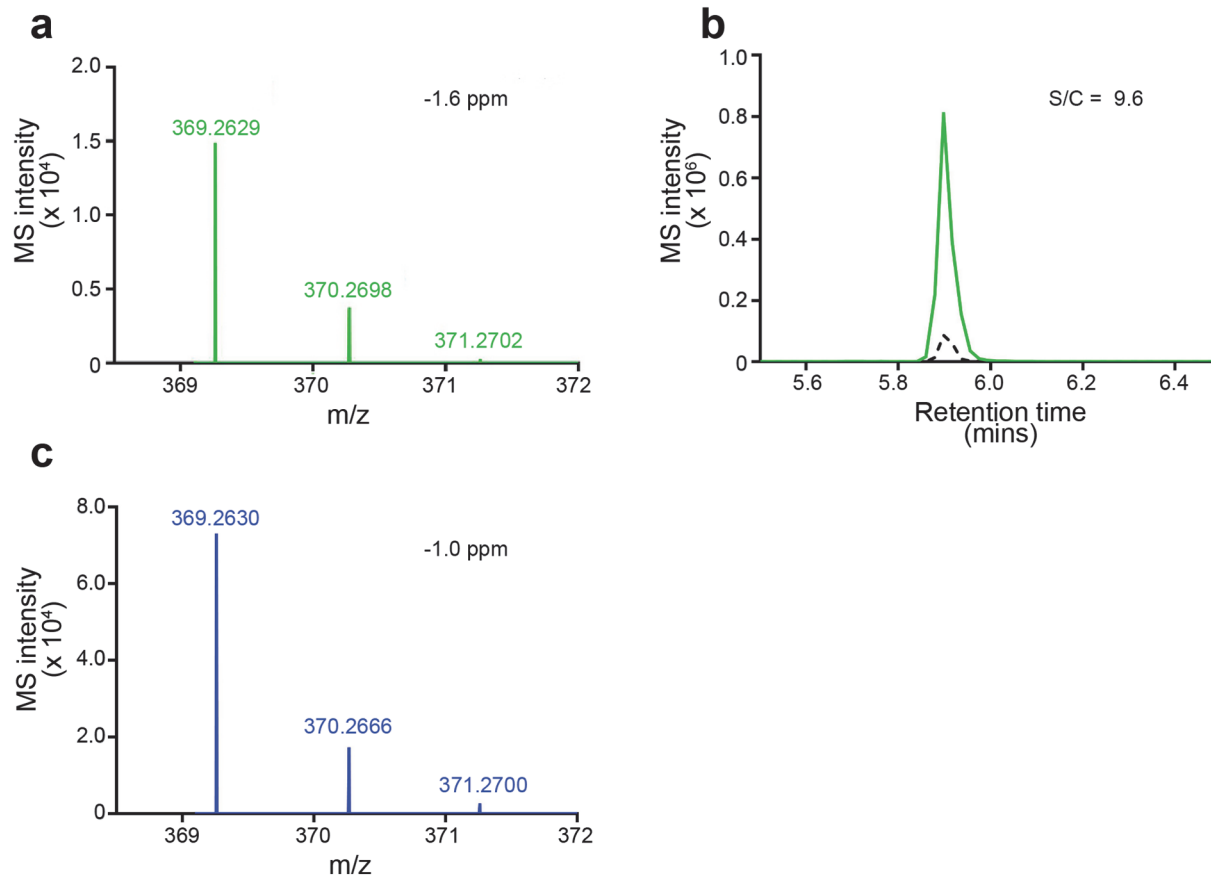

**Supplementary Figure 5 | Binding of misoprostol-FA to purified EP3 receptor by mass spectrometry.** (a) A representative high-resolution MS spectrum and (b) LC-MS chromatograms for misoprostol-FA detected in the purified EP3-T4L receptor. Extracted ion chromatograms of misoprostol-FA detected in the EP3 receptor sample and the human A<sub>2A</sub> adenosine receptor control are indicated by a solid line and a dashed line, respectively. (c) The mass spectrum of misoprostol-FA from the compound standard. Mass error of the mono-isotope peak compared to the theoretical accurate mass of misoprostol-FA (369.2635 *m/z*) is indicated in each panel. The experiment was repeated 3 times independently with similar results.

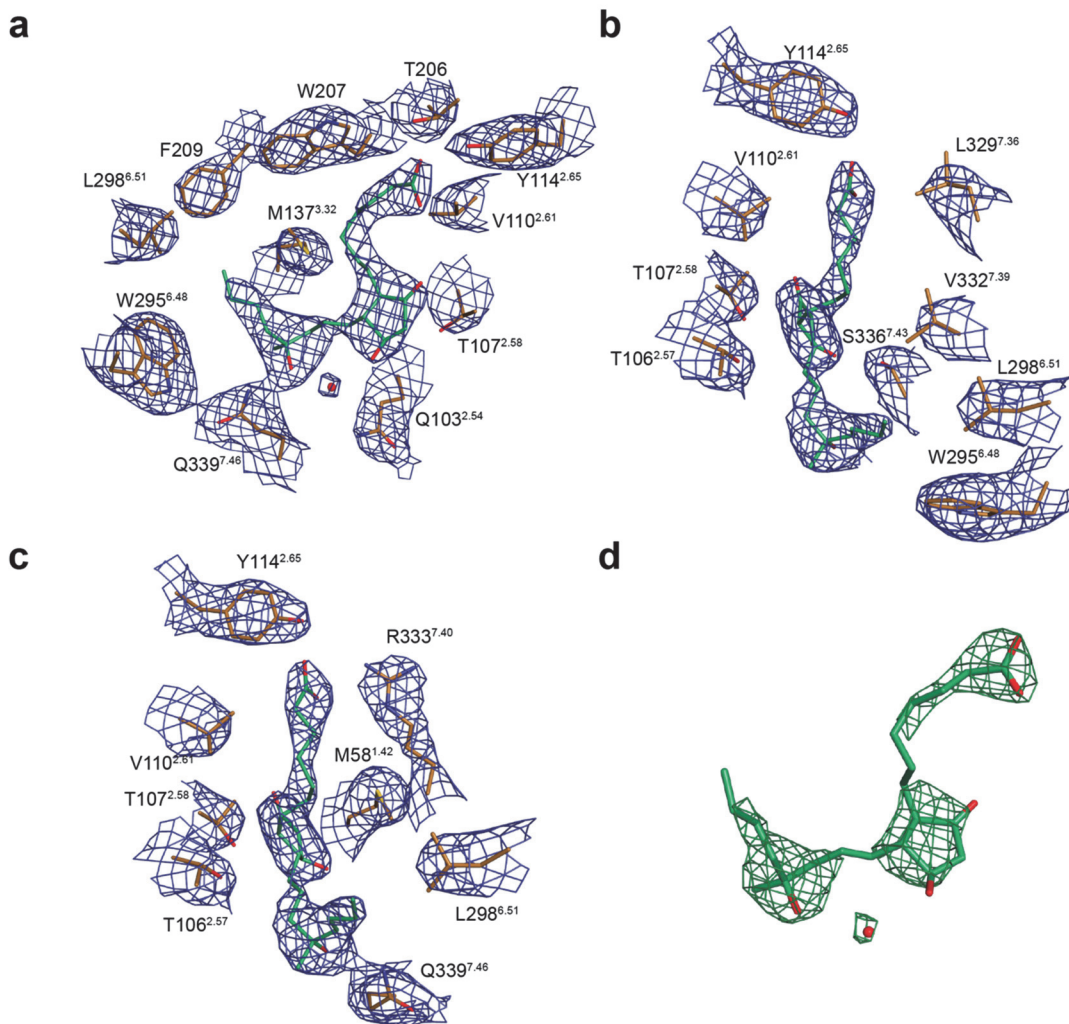

**Supplementary Figure 6 | Electron density maps of EP3-miso structure.** (a-c) 2Fo-Fc electron density maps of EP3-miso binding site contoured at 1  $\sigma$ . (d) Simulated annealing ligand omit Fo-Fc electron density map for misoprostol-FA and the binding site water molecule contoured at 2.7  $\sigma$ . Residues of the binding site and misoprostol-FA are shown in stick gold and green, respectively. Water molecule is shown as a red sphere.

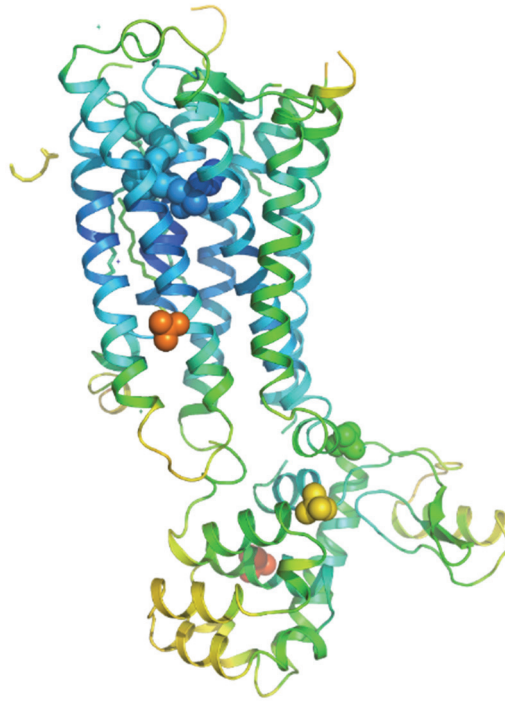

**Supplementary Figure 7 | B-factor distribution on the EP3 crystal structure.** EP3 receptor is shown as ribbons, lipids are shown as sticks, and misoprostol-FA and sulfate ions as spheres. Colors represent B-factor for Misoprostol-FA and lipid atoms, protein residues and sulfate ions ranging from dark blue ( $60 \text{ \AA}^2$ ) to red ( $220 \text{ \AA}^2$ ).

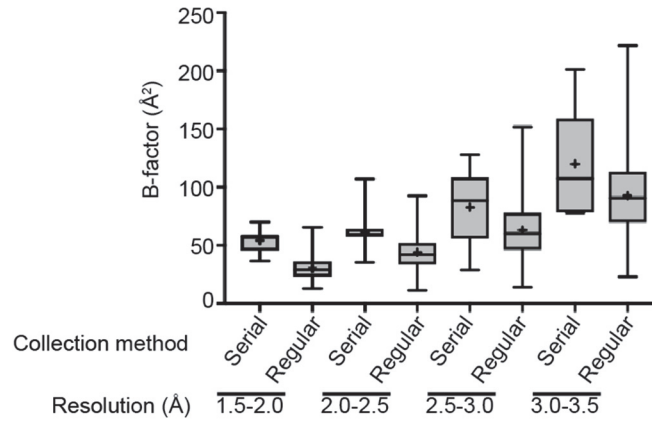

**Supplementary Figure 8 | Comparison of the B-factors from membrane protein structures solved from data collected using serial crystallography vs traditional crystallography.** B-factor data was downloaded, binned and plotted as box and whisker where boxes represent the 25th and 75th percentile, the center line is the median, whiskers are minimum and maximum values, plus sign indicate the mean. The data are from records at the Protein Data Bank for published membrane protein structures collected using serial crystallography (serial, 58 structures) and traditional synchrotron crystallography (regular, 1650 structures).
